# Supplementary material for: FI-Net: Identification of Cancer Driver Genes by Using Functional Impact Prediction Neural Network
Source: Front Genet. 2020 Nov 10;11:564839. doi: 10.3389/fgene.2020.564839 (PMC7683798; doi:10.3389/fgene.2020.564839)
Supplement: Supplementary Table 1 — The driver genes predicted by FI-net. [file Table_1.XLSX]

## Sheet: Sheet1
THCA	LAML	LGG	BRCA	OV	GBM	HNSC	BLCA	LUAD	LUSC	KIRC	KICH	SKCM	PRAD	COAD	PAAD	READ	STAD	UCEC	ACC	CESC	CHOL	ESCA	KIRP	LIHC	PCPG	SARC	TGCT	THYM	UCS	UVM
NRAS	DNMT3A	ATRX	PIK3CA	TP53	EGFR	TP53	TP53	CSMD3	TP53	MUC4	MUC4	NRAS	SPOP	APC	KRAS	APC	TP53	PTEN	TP53	MUC4	BAP1	TP53	MET	TP53	HRAS	TP53	MUC2	MUC2	TP53	BAP1
BRAF	FLT3	CIC	TP53	NF1	PTEN	CSMD3	SYNE1	TP53	RYR2	PBRM1	TP53	DNAH5	TP53	SYNE1	TP53	TP53	SYNE1	PIK3CA	OTOP1	PIK3CA	IDH1	SYNE1	KMT2C	CTNNB1	EPAS1	ATRX	MUC4	MUC4	PPP2R1A	GNA11
HRAS	NPM1	IDH1	MAP3K1	BRCA1	TP53	LRP1B	FGFR3	USH2A	CSMD3	VHL	MUC6	MUC16	TUBB8P7	TP53	SMAD4	NEFH	DNAH5	SYNE1	IDUA	KMT2C	PBRM1	DNAH5	SMARCA4	MUC4	MUC6	PCLO	KRAS	MUC6	FBXW7	GNAQ
TG	IDH1	TP53	GATA3	BRCA2	ATRX	DNAH5	KMT2B	KRAS	LRP1B	SETD2	FRG1	PCLO	SYNE1	PRKDC	CDKN2A	SYNE1	LRP1B	NEB	TUBBP5	KMT2D	TP53	LRP1B	MUC4	USH2A		CSMD3	KIT	GTF2I	PIK3CA	SF3B1
DNAH9	IDH2	EGFR	KMT2C	MUC16	NF1	SYNE1	DNAH5	LRP1B	USH2A	BAP1	MUC2	DNAH7	NBPF10	KRAS		TBP	FAT4	DST	CTNNB1	GPR98		RYR2	SETD2	OBSCN			SEC22B	HRAS	CHD4	EIF1AX
	TET2	NOTCH1	CDH1	HMCN1	PIK3R1	NOTCH1	PIK3CA	RYR2	MUC16	KDM5C	PABPC1	TP53	FOXA1	NEB		KRAS	OBSCN	DNAH5	NEFH	EP300		USH2A	BAP1	MUC16			MUC6	NEB	MUC4
	TP53	IDH2	CROCCP2	USH2A	FLG	FAT1	KMT2C	PAPPA2	SYNE1	MTOR	MUC16	GPR98	ANKRD36C	OBSCN		CCDC168	PCLO	DNAH9		SYNE1		ZIC4	PKHD1	DNAH10			OBSCN	RYR2	PTEN
	RUNX1	PTPN11	USH2A	CSMD3	IDH1	RYR2	FLG	EGFR	RYR3	CROCCP2	ANKRD30BL	CACNA1D	SPTA1	RYR2		ZFPM1	RYR2	RYR2		SYNE2		HMCN1	SYNE1	SYNE2			NRAS	KMT2C
	CEBPA	TUBA1C	RYR2	FAT3	PIK3CA	PCLO	MACF1	KEAP1	ZFHX4	DNAH9	PTEN	COL1A1	KMT2C	FBXW7		ATM	ARID1A	CSMD3		MYH9		PCLO	FAT1	ABCA13			PLEC	DNAH17
	NRAS	FUBP1	RUNX1	CACNA1C	SPTA1	USH2A	ARID1A	NF1	FLG	PTEN	SDHA	KIF21B	OBSCN	SMAD4		NCOR2	CSMD1	PIK3R1		PLEC		CSMD3	CUL3	GPR98				DNAH8
	WT1	OBSCN	BRCA1	GPR98	RYR2	FLG	HMCN1	MUC16	SI	DST	CDC27	CSMD1	MUC17	ZC3H13		NRAS	CSMD3	CTNNB1		DST		DNAH10	WDFY3	NEB				GPR98
	U2AF1	PTEN	BRCA2	DST	PCLO	COL11A1	KDM6A	FLG	DNAH5		NBPF10	DNAH8	ATM	MUC16		ZSCAN1	FAT3	LRP2		FLG		DST	KIF1A	RYR2				HMCN1
	KRAS	SMARCA4	FAT3	ZFYVE26	LZTR1	MUC16	MUC16	ZNF804A	SPTA1			LRP1B	LRP1B	SOX9		MEGF11	MUC16	TP53				LAMA1	DNAH8	DNAH6				OBSCN
		MYH8	MAP2K4	AHNAK2	MUC16	PIK3CA	NEB	XIRP2	DNAH11			COL2A1	RYR2	CNTNAP5			PIK3CA	USH2A				RYR3	KIAA1109	KMT2C				MUC16
		ARHGAP5	PTEN	MUC17	RB1	PLEC	AHNAK	ZFHX4	COL11A1			KSR2	FAT3	DST			DST	DNAH10				DYNC2H1	PCLO	XIRP2				MACF1
		MYH2	ATM	EGFR	HMCN1	PKHD1L1	ERCC2	SPTA1	XIRP2			DNAH9	RRN3P2	MUC4			FLG	DNAH8				MUC16	ALMS1	MUC2				DNAH5
		RYR2	HMCN1	DNAH5	DNAH5	PRDM9	SF3B3	FBN2	PKHD1L1			FLG	DNAH7	TRRAP			HMCN1	RYR3				MUC4	LRP2	CSMD3				LRP2
		NF1	NEB	LRP2	USH2A	SI	ELF3	NLRP3				MGAM	KMT2D	MYCBP2			SPTA1	ARID1A					CUBN	APOB				RRBP1
		PIK3CA	FLG	RYR2	LRP2	SMARCA4	DST	STK11				MYH11	RYR1	FAT4			DNAH7	DNAH7						SYNE1				TNXB
		HMCN1		RB1	FLNA	AHNAK	EP300	CACNA1E				EPHB2	RYR3	PCLO			BRD8	APOB						PKHD1L1				BACH1
		GPR98		CDK12	CHD8	CASP8	DNAH7	COL11A1				GRIK3	NBPF1	DNAH11			RYR3	ASPM						FLG
		SYNE1		GLI2	MUC17	FAM135B	FAT4	ARID1A				HECW2	EP400	LRP1B			USH2A	MACF1						PCLO
		ABCD1		APOB	AFF2	ASXL3	MUC17	ABCB5				SPEG	DNAH17				DNAH8	DMD						LRP1B
		MUC16		ZNF236		PRKDC	DNAH17	CSMD1				CACNA1G	MLLT3				NEB	FAT3						LRP2
		DNAH5		PRKDC		CDKN2A	RYR2	TRRAP				SRGAP3	MUC16				DNAH3	PCLO						KRTAP4-3
		DNMT3A		ODZ1		DNAH8	DNAH8	FAT3				PCDHA11	USH2A				PLEC	FAT4						DNAH5
		LRP2		SON		DST	XIRP2	APOB				CACNA1I	AHNAK2				HSPG2	DNAH2						DNAH9
		CADPS				FAT3	AHNAK2	ZEB1				ANK3	CSMD3				CDH1	FAT1						MUC6
		PIK3R1				XIRP2	OBSCN	MUC17				PKHD1L1	HMCN1				SMAD4							DNAH1
		PRDM9				KMT2D	PDE4DIP	HMCN1				ATP1A2	MACF1				XIST							RYR3
		FAT2				DNAH7	ATM	BRAF				PCDHA12	MYH8				DNAH11							DNAH8
		ARID1A				NSD1	LRP1B	CNGB3				CHD5	PCLO											DMD
		PRPF8				DNAH9	DNAH3	NLRP2				KCNQ5	MUC4											FRAS1
		PDGFRA				OBSCN	CLIP1	CD163				LTBP2	COL11A1											DYNC1H1
		NIPBL				HUWE1	MDN1	HDAC2				NBPF1
							SPTAN1	RYR3				SLC4A8
							ERBB2	TRPV5				APOB
												DNAH3
												BCLAF1
												NF1
												TRRAP
												MYLK
												SLC12A5
												HIVEP1
												INPP5D
												EP400
												ITGAL
												PCDHA13
												A1CF
												SCN8A
												WNK2
												CYFIP2
												KMT2A
												KCNB1
												CSMD2
												FAT3
												XIRP2
												KCND3
												GUCY1A3
												CELSR1
												FAT4
												MYH1
												USH2A
												COL4A4
												MUC17
												ANKRD11
												KCNJ6
